# Supplementary material
Source: PubMed Central journal article supplement (PMC4936539)
Supplement: supp_pp.15.01237_PP2015-01237R2_Supplemental_Material.pdf [file supp_pp.15.01237_PP2015-01237R2_Supplemental_Material.pdf]

1 **Supplemental Data**

2  
3

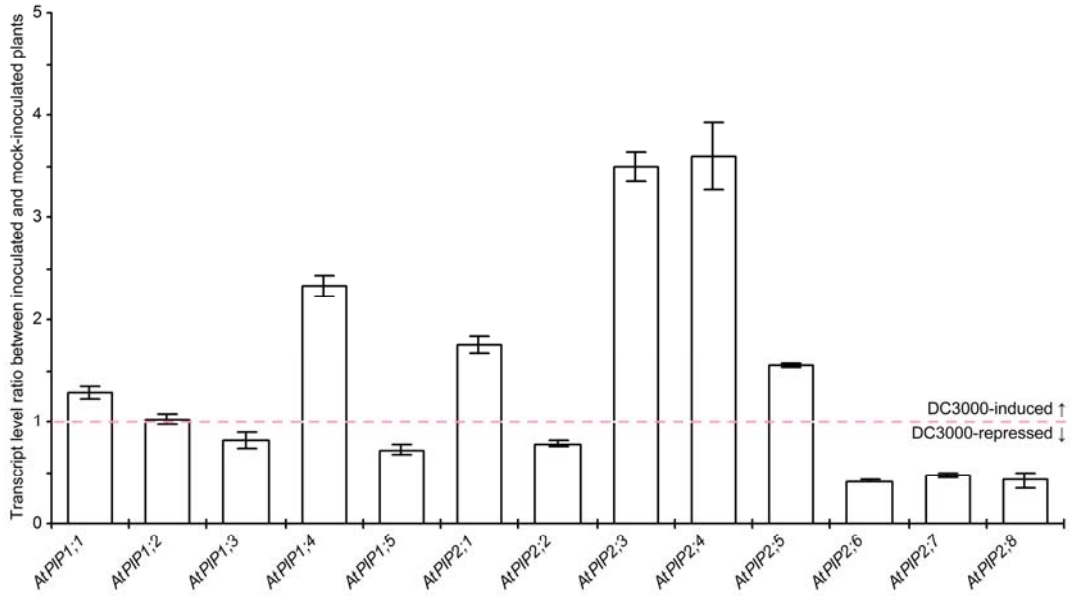

4  
5  
6  
7  
8  
9

**Supplemental Figure S1.** Differential expression of *AtPIP* Genes in DC3000-inoculated plants. Gene expression in leaves was analyzed by real-time RT-PCR and expression level of each gene was shown as the ratio (mean  $\pm$  SEM;  $n = 3$ ) of transcript quantities between inoculated and mock-inoculated plants.

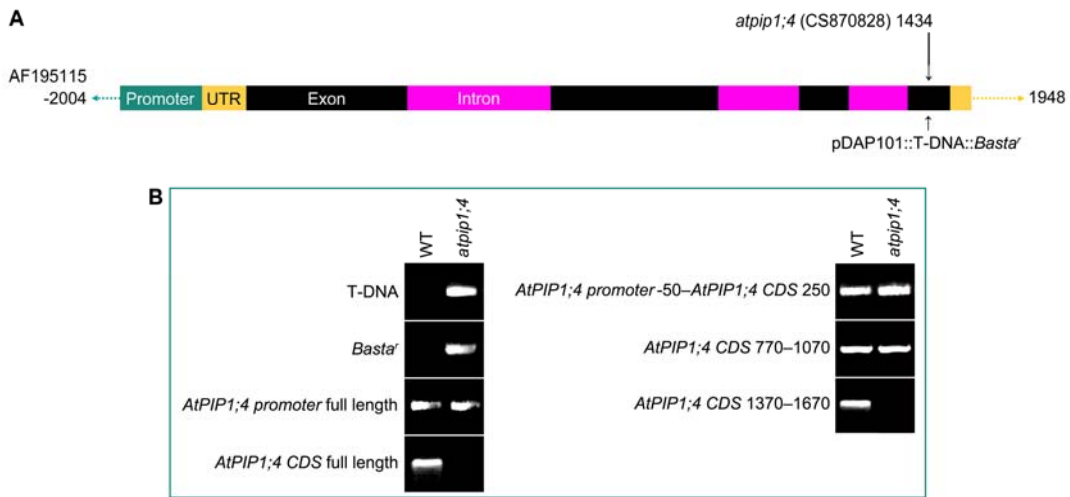

10

11 **Supplemental Figure S2.** An insertional mutation of *AtPIP1;4*. A, A map showing the  
12 pDAP101 vector that contains the selective marker gene *Basta'* (bottom label) and  
13 location of a T-DNA insertion in *atpip1;4* mutant. Seed stock number is in parenthesis.  
14 Colored bars indicate the gene DNA components, including untranslated region (UTR).  
15 B, Identification of T-DNA-indexed *AtPIP1;4* mutation. The genomic DNA was  
16 analyzed by PCR using primers specific to gene sequences indicated on left.

17

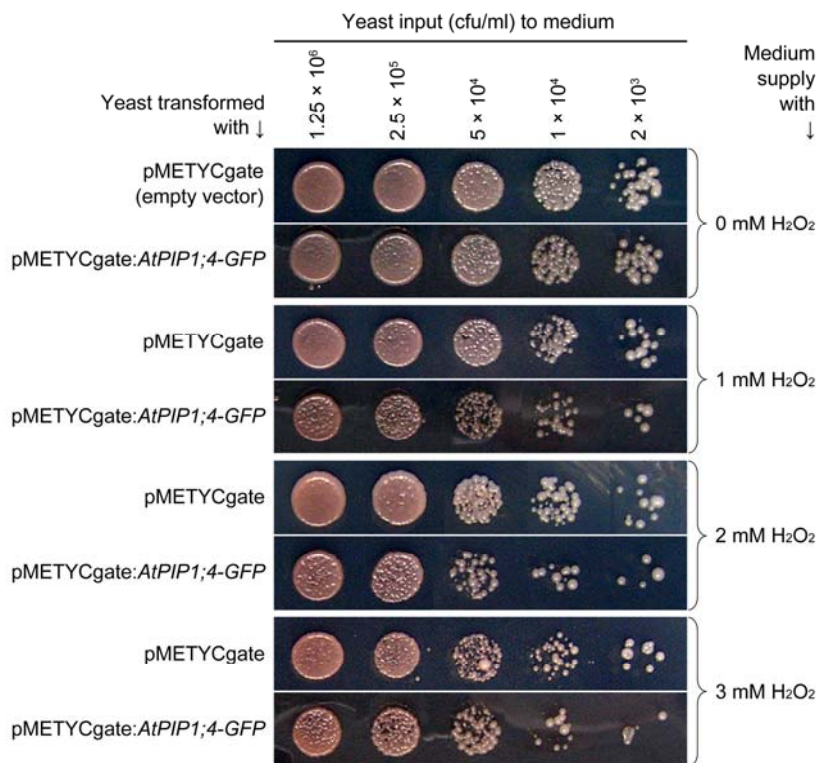

18

19 **Supplemental Figure S3.** Yeast colonies grown with H<sub>2</sub>O<sub>2</sub> supply at the indicated  
 20 concentrations. Colonies were photographed on 3 days after incubation on medium.

21

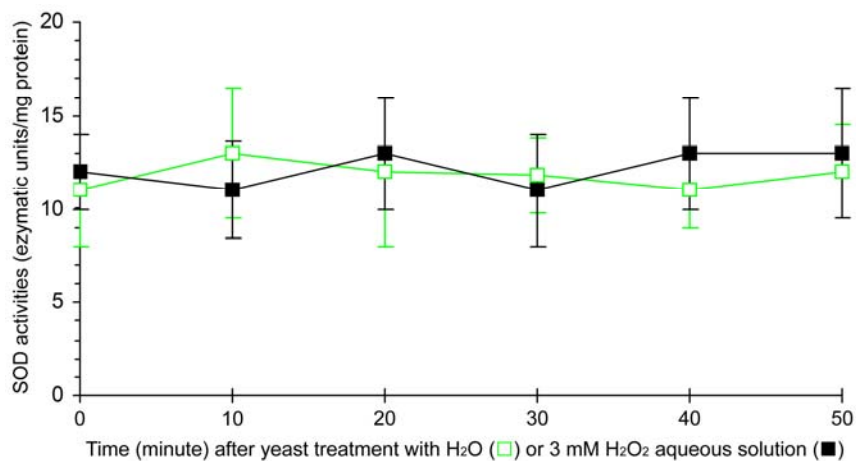

22

23 **Supplemental Figure S4.** Yeast SOD activity measurements. Data shown are means ±  
 24 SEMs ( $n = 3$ ).

25

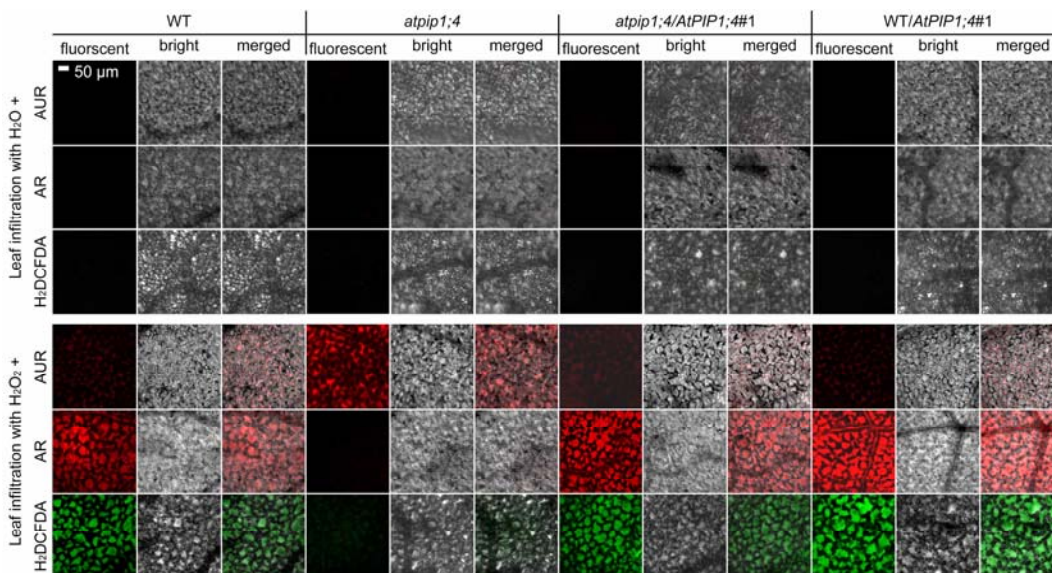

26

27 **Supplemental Figure S5.** Imaging of apoplastic H<sub>2</sub>O and cytoplasmic H<sub>2</sub>O<sub>2</sub> or ROS in  
28 leaves of plants treated with H<sub>2</sub>O<sub>2</sub> or H<sub>2</sub>O. Leaves were observed by confocal  
29 microscopy on 45 minutes after infiltration treatment with agents shown on left. AUR  
30 and AR visualized apoplastic and cytoplasmic H<sub>2</sub>O<sub>2</sub>, respectively, and H<sub>2</sub>DCFDA  
31 detected cytoplasmic ROS.

32

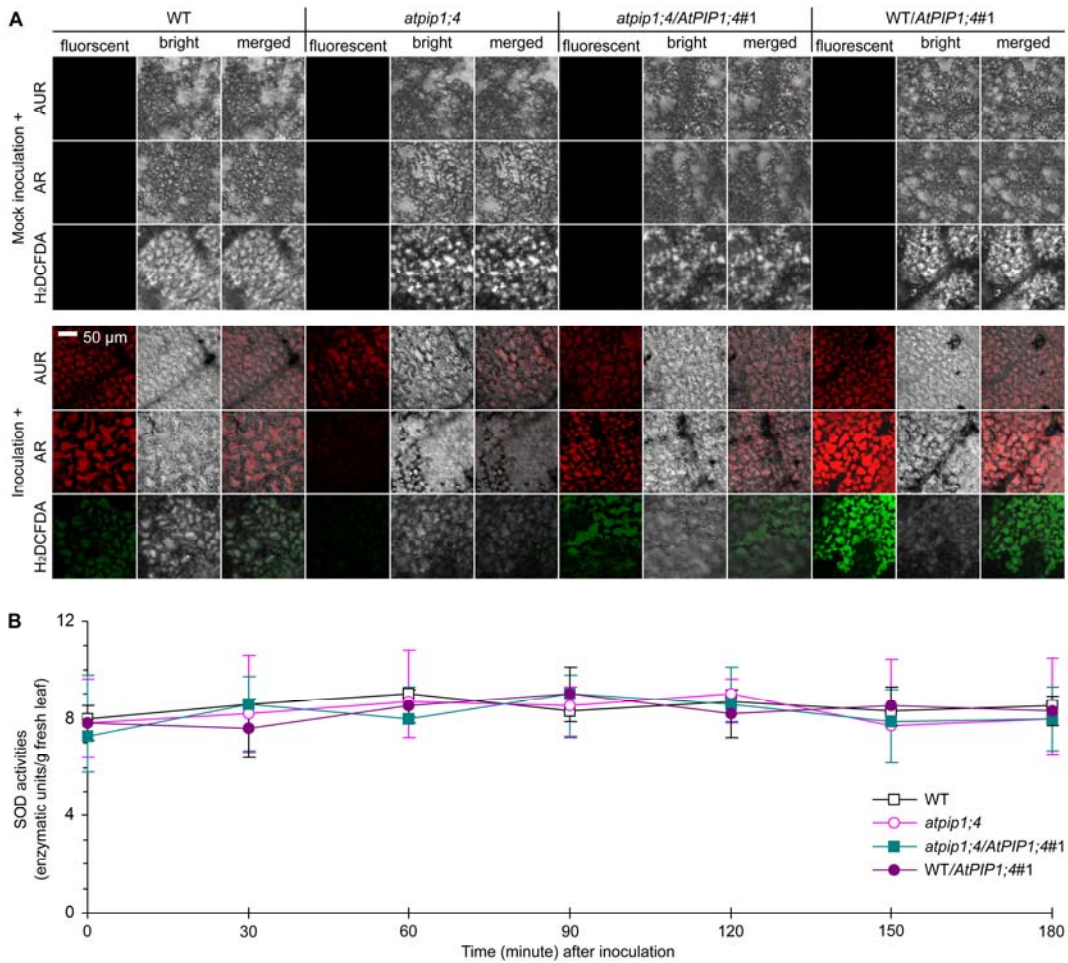

33

34 **Supplemental Figure S6.** H<sub>2</sub>O<sub>2</sub> or ROS visualization and SOD activities in leaves of  
 35 inoculated and mock-inoculated plants. A, Leaf imaging by confocal microscopy at one  
 36 hour after inoculation or mock inoculation. AUR and AR visualized apoplastic and  
 37 cytoplasmic H<sub>2</sub>O<sub>2</sub>, respectively, and H<sub>2</sub>DCFDA detected cytoplasmic ROS.

38 B, SOD activity quantification (means ± SEMs; *n* = 3).

39

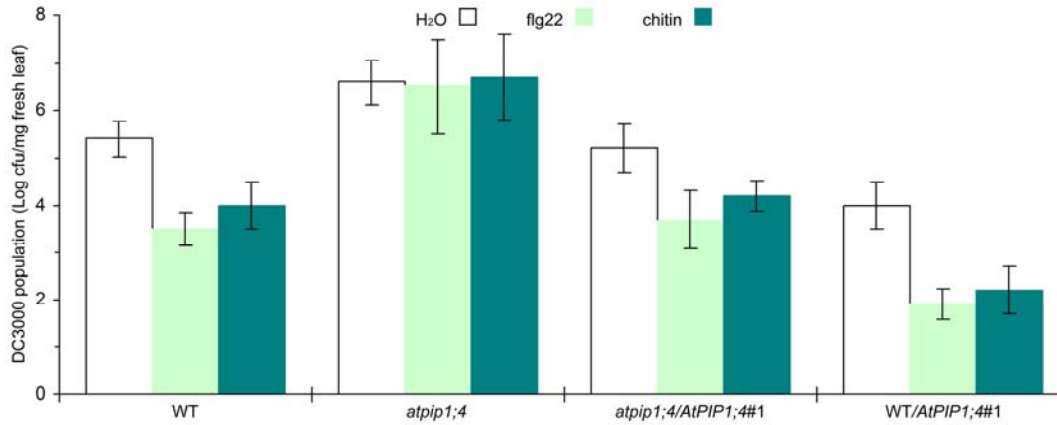

40

41 **Supplemental Figure S7.** The effects of PAMPs on DC3000 population growth in  
 42 plant leaves. Data shown are means  $\pm$  SEMs ( $n = 3$ ) of bacterial population in  
 43 inoculated leaves 3 dpi (5 days after treatment with the indicated agents).

44

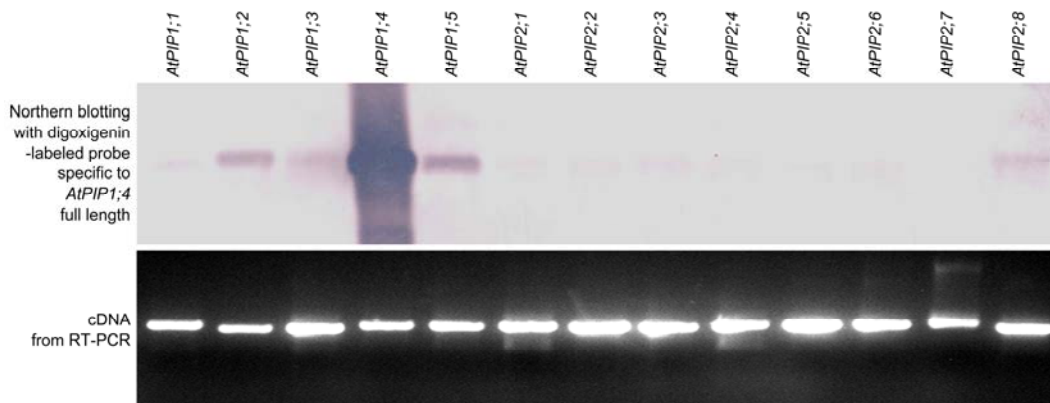

45

46 **Supplemental Figure S8.** Northern blotting analysis with *AtPIP1;4* probe hybridized to  
 47 RT-PCR products of *AtPIPs*. RT-PCR was performed with specific primers and total  
 48 RNA isolated from leaves of the WT plant. RNA was used at 1  $\mu$ g in a 25  $\mu$ l reaction  
 49 solution to produce cDNA; uniformly 5  $\mu$ g cDNA was used in electrophoresis for every  
 50 *AtPIP* gene.

51

52 **Supplemental Table S1.** Relative levels of *MPK6* expression in leaves

| Treatment group            | Plant genotype |                 |                            |                       |
|----------------------------|----------------|-----------------|----------------------------|-----------------------|
|                            | WT             | <i>atpip1;4</i> | <i>atpip1;4/AtPIP1;4#1</i> | WT/ <i>AtPIP1;4#1</i> |
| H <sub>2</sub> O (control) | 1 ± 0.017      | 0.86 ± 0.096    | 1.17 ± 0.414               | 1.14 ± 0.092          |
| Flg22                      | 0.85 ± 0.159   | 0.66 ± 0.07     | 0.99 ± 0.248               | 1.03 ± 0.037          |
| Chitin                     | 0.83 ± 0.162   | 0.78 ± 0.19     | 1.05 ± 0.414               | 1.03 ± 0.108          |

53 Note: data are *MPK6* transcript quantity ratios to *ACTIN2*.

54

55 **Table S2.** Information on genes tested and primers used in this study

| Gene (locus code)              | Primers / product size (bp) / subjects                                                                                                                                     |
|--------------------------------|----------------------------------------------------------------------------------------------------------------------------------------------------------------------------|
| <i>Actin2</i><br>(AT3G18780)   | 5'-GGCTCCTCTTAACCCAAAGG-3',<br>5'-CCCTCGTAGATTGGCACAGT-3' / 183 / real-time RT-PCR<br>(qRT-PCR)                                                                            |
| <i>AtPIP1;1</i><br>(AT3G61430) | 5'-CTTGCTGCTCTTTACCATGTGG-3',<br>5'-AGCAACTAAGGACAAGGCCAG-3' / 121 / qRT-PCR                                                                                               |
|                                | 5'-ATGGAAGGCAAGGAAGAAG-3',<br>5'-GCTTCTGGACTTGAAGGG-3' / 858 / RT-PCR for Northern blotting                                                                                |
| <i>AtPIP1;2</i><br>(AT2G45960) | 5'-ACTACCTGTGTGTAACGTGTGT-3',<br>5'-TGCCTGCTTGAGATAAACCCA-3' / 159 / qRT-PCR                                                                                               |
|                                | 5'-ATGGAAGGTAAAGAAGAAGA-3',<br>5'-TCCGATAATTGAAACCTTAC-3' / 822 / RT-PCR for Northern blotting                                                                             |
| <i>AtPIP1;3</i><br>(AT1G01620) | 5'-TTTGCTGTGGATGATCTGGT-3'<br>5'-CGAGAAACCAAGCCGAAACA-3' / 188 / qRT-PCR                                                                                                   |
|                                | 5'-ATGGAAGGGAAGAAGAGG-3'<br>5'-GGATCTGGACTTGAATGGAA-3' / 858 / RT-PCR for Northern blotting                                                                                |
| <i>AtPIP1;4</i><br>(AT4G00430) | 5'-(1056)TGGCAAAGGGTCTCTGAAGTC(1076)-3',<br>5'-(1234)CCCCACATTCACGAAGTCA(1215)-3' / 179 / qRT-PCR                                                                          |
|                                | 5'-ATGGAAGGCAAAGAAGAAGATG-3',<br>5'-CTAACTCTTGCTCTTGAAAGGA-3' / 864 / RT-PCR for Northern blotting                                                                         |
|                                | 5'-GGATGGAAGGCAAAGAAGAA-3',<br>5'-CGACTCTTGCTC TTGAAAGGA-3' / 864 / hybridization probe                                                                                    |
|                                | 5'-GGGGTACCATGGAAGGCAAAGAAGAA-3' ( <i>Kpn</i> I),<br>5'-CGGGATCCACTCTTGCTC TTGAAAGGA-3' ( <i>Bam</i> H I) / 864 /<br>CDS cloning by RT-PCR and overexpression construction |
| <i>AtPIP1;5</i><br>(AT4G23400) | 5'-AAGTTGGTGGTGATAGAGTGAG-3',<br>5'-TGGTTCCTTATAGTCCTTGCTCTCC-3' / 136 / qRT-PCR                                                                                           |
|                                | 5'-ATGGAAGGCAAAGAAGAA-3',                                                                                                                                                  |



|                                |                                                                                                                                                               |
|--------------------------------|---------------------------------------------------------------------------------------------------------------------------------------------------------------|
|                                | 5'-TGTCTTGGACTTGAAAGG-3' / 861 / RT-PCR and Northern blotting                                                                                                 |
| <i>AtPIP2;1</i><br>(AT3G53420) | 5'-GCTGCCAACGTCTAAACACA-3',<br>5'-ACACAACGCATAAGAACCTCT-3' / 232 / qRT-PCR                                                                                    |
|                                | 5'-ATGGCAAAGGATGTGGAA-3',<br>5'-GACGTTGGCAGCACTTCTG-3' / 861 / RT-PCR and Northern blotting                                                                   |
| <i>AtPIP2;2</i><br>(AT2G37170) | 5'-CAACGTTTGTAGTTTTTGCCAC-3',<br>5'-CATTGGCATTGGCACATAATCA-3' / 187 / qRT-PCR                                                                                 |
|                                | 5'-ATGGCCAAAGACGTGGAAG-3',<br>5'-AACGTTGGCTGCACTTCTG -3' / 855 / RT-PCR and Northern blotting                                                                 |
| <i>AtPIP2;3</i><br>(AT2G37180) | 5'-TCCACTCGTATCTTAGCTTCTTCC-3',<br>5'-ACACCAAACCTACATACGTTGC-3' / 111 / qRT-PCR                                                                               |
|                                | 5'-ATGGCTAAAGACGTGGAAG-3',<br>5'-AACGTTGGCTGCACTTCT-3' / 855 / RT-PCR for Northern blotting                                                                   |
| <i>AtPIP2;4</i><br>(AT5G60660) | 5'-AGAAACATATCCTCTTTTCCACTCG-3',<br>5'-CGTTGCAAAGATGAATTGAAAAACA-3' / 112 / qRT-PCR                                                                           |
|                                | 5'-ATGGCAAAGACTTGGATG-3',<br>5'-AGCAAAGCTCCTAAAGGAG-3' / 873 / RT-PCR for Northern blotting                                                                   |
| <i>AtPIP2;5</i><br>(AT3G54820) | 5'-ACCTGAACCTCTATTTCGACGC-3',<br>5'-CACTGGTCAGGATTCAGGGCT-3' / 159 / qRT-PCR                                                                                  |
|                                | 5'-ATGACGAAGGAAGTGGTTGG-3',<br>5'-AACGTGAGGCTGGCTCCT-3' / 858 / RT-PCR for Northern blotting                                                                  |
| <i>AtPIP2;6</i><br>(AT2G39010) | 5'-ATTCTTTGGGCCAGGAAGGG-3',<br>5'-TCCCCACAAAGCCACAAAT-3' / 129 / qRT-PCR                                                                                      |
|                                | 5'-ATGACGAAGGATGAGTTGACG-3',<br>5'-AGCATGGAGCTCATGAAGC-3' / 867 / RT-PCR for Northern blotting                                                                |
| <i>AtPIP2;7</i><br>(AT4G35100) | 5'-TGAGAGAGATGGTGGATTGATGT-3',<br>5'-AGAGAAACCAAAGGCAAACGA-3' / 105 / qRT-PCR                                                                                 |
|                                | 5'-ATGTCGAAAGAAGTGAGCG-3',<br>5'-ATTGGTTGCGTTGCTTCG-3' / 840 / RT-PCR for Northern blotting                                                                   |
| <i>AtPIP2;8</i><br>(AT2G16850) | 5'-TCATCTTTGTCCGTTGCTTTCT-3',<br>5'-TGCATGTGGGTTTATATAAACTTG-3' / 106 / qRT-PCR                                                                               |
|                                | 5'-ATGTCAAAGAAGTGAGTGAAG-3',<br>5'-ATTGGTTGGGTTGCTGC-3' / 834 / PCR for Northern blotting                                                                     |
| <i>ARPI</i><br>(AT5G44300)     | 5'-CCATCTCCGACGAATCTCCA-3',<br>5'-CCACTTCCGACCAGATCCT-3' / 131 / qRT-PCR                                                                                      |
| <i>GFP</i><br>(U56995)         | 5'-TGCTCTAGAAATGGTGAGCAAGGGCGAGGAGC-3' ( <i>Xba</i> 1),<br>5'-ACGCGTCTGACTTACTTGTACAGCTCGTCCATGCCGAGA-3' ( <i>Sal</i> 1) / 738 bp / cloning and recombination |



|                              |                                                                               |
|------------------------------|-------------------------------------------------------------------------------|
| <i>GSL5</i><br>(AT4G03550)   | 5'-GATGGGATTTCCACCCTATACT-3',<br>5'-GTGCCAATGTCTGACCTCTGTA-3' / 166 / qRT-PCR |
| <i>MPK3</i><br>(AT3G45640)   | 5'-CTCACAATGAGGATGCGAAA-3',<br>5'-ATTCGGGTCGTGCAATTTAG-3' / 197 / qRT-PCR     |
| <i>MPK6</i><br>(AT2G43790)   | 5'-CCCGACAGTGCATCCTTTAG-3',<br>5'-TGCAACGAGTTCAGGTATGG-3' / 114 / qRT-PCR     |
| <i>NbEF1α</i><br>(AY206004)  | 5'-ACCCTTCTTGAGGCTCTTGAC-3',<br>5'-GTCAGACCAGTAGGTCCAAAGG-3' / 179/qRT-PCR    |
| <i>NbRbohB</i><br>(AB079499) | 5'-TTGGAACCAGTGTCGGAACC-3',<br>5'-CCAATAAAGCCAGCTCGGGA-3' / 150/ qRT-PCR      |
| <i>NbWIPK</i><br>(AB098729)  | 5'-ATACGGAGCTGAATGAGATGGT-3',<br>5'-GTAACGGTGGAGGAATCACATC-3' / 156 / qRT-PCR |
| <i>NPRI</i><br>(At1G64280)   | 5'-CGACACTGCTGAGAAACGAC-3',<br>5'-CCGACGACGATGAGAGAGTT-3' / 182 / qRT-PCR     |
| <i>PR-1</i><br>(At2G14610)   | 5'-TTCTTCCCTCGAAAGCTCAA-3',<br>5'-AAGGCCACCAGAGTGATG-3' / 174 / qRT-PCR       |
| <i>PR-2</i><br>(At3G57260)   | 5'-ATTCGACGAAATCTCGACT-3',<br>5'-ATAGCTTCCCTGGCCTTCT-3' / 195 / qRT-PCR       |
